# Supplementary material
Source: publisher figshare collection journal article supplement (https://springernature.figshare.com/articles/dataset/_/20101841)
Supplement: Supplementary file 1 [file 2]

**Additional file 6: Table S5. Summary of the arrays and batches used in genotyping of the Norwegian Mother, Father and Child Cohort.**

| Project       | Batch name        | Genotyping chip                                                                    | Genotyping center                         | Cohort design                             | Genotype build | N genotyped SNPs | N individuals sent | N individuals genotyped |
|---------------|-------------------|------------------------------------------------------------------------------------|-------------------------------------------|-------------------------------------------|----------------|------------------|--------------------|-------------------------|
| HARVEST       | m12b              | Illumina Human Core Exome 12v1.1                                                   | Genomics core facility, Trondheim, Norway | Trios                                     | GRCh37 (hg19)  | 542,585          | 20,668             | 1,692                   |
| HARVEST       | m12a              |                                                                                    |                                           |                                           |                | 542,585          |                    | 18,972                  |
| HARVEST       | M24               | Illumina Human Core Exome 24v1.0                                                   |                                           |                                           |                | 547,644          | 12,874             | 12,874                  |
| ERC (HARVEST) | rotterdam1 / rot1 | Illumina Global Screening Array MD v.1.0                                           | ERASMUS MC, Rotterdam, Netherlands        |                                           |                | 692,367          | 27,000             | 17,949                  |
| ERC (HARVEST) | rotterdam2 / rot2 |                                                                                    |                                           |                                           |                | 692,338          |                    | 9,041                   |
| NORMENT       | Feb-18            | Illumina Global Screening Array MD v.1.0 + 50k custom Omni Express overlap content | deCODE Genetics, Reykjavik, Iceland       |                                           |                | GRCh38 (hg38)    | 693,143            | 9,841                   |
| NORMENT       | Jun-15            | Illumina Human Omni Express-24v1.0                                                 |                                           | Unrelated parents (genotyped as controls) | GRCh37 (hg19)  | 708,882          | 6,040              | 2,976                   |
| NORMENT       | Jan-15            |                                                                                    |                                           |                                           |                | 710,146          |                    | 2,983                   |
| NORMENT       | May-16            | Illumina Infinium Omni Express-24v1.2                                              |                                           | Trios (& controls)                        | GRCh38 (hg38)  | 712,628          | 19,357             | 17,608                  |
| ADHD/TED      | ADHD              |                                                                                    |                                           | ADHD case trios and singleton controls    | GRCh37 (hg19)  | 713,599          | 5,790              | 5,410                   |
| ADHD/TED      | ADHD2             |                                                                                    |                                           |                                           |                |                  | 2,502              | 2,426                   |

|         |             |                                          |  |                                                              |               |         |        |        |
|---------|-------------|------------------------------------------|--|--------------------------------------------------------------|---------------|---------|--------|--------|
| NORMENT | Feb-20_v1   | Illumina Global Screening Array MD v.1.0 |  | Unrelated with moderate percentage of first-degree relatives |               | 693,143 | 17,930 | 13,505 |
| NORMENT | Feb-20_v3   | Illumina Global Screening Array MD v.3.0 |  | Unrelated with small percentage of first-degree relatives    | GRCh38 (hg38) | 687,316 |        | 4,418  |
| NORMENT | Aug-20_996  |                                          |  |                                                              |               |         | 25,004 | 24,999 |
| NORMENT | Aug-20_1029 |                                          |  |                                                              |               |         | 25,004 | 24,980 |
| NORMENT | Nov-20_1066 |                                          |  |                                                              |               |         | 25,002 | 24,995 |
| NORMENT | Nov-20_1077 |                                          |  |                                                              |               |         | 4,700  | 4,699  |
| NORMENT | Nov-20_1108 |                                          |  |                                                              |               |         | 4,794  | 4,792  |
| NORMENT | Nov-20_1109 |                                          |  |                                                              |               |         | 5,640  | 5,625  |
| NORMENT | Nov-20_1135 |                                          |  |                                                              |               |         | 4,606  | 4,605  |
| NORMENT | Nov-20_1146 |                                          |  |                                                              |               |         | 5,264  | 5,256  |
| NORMENT | Mar-21_1273 |                                          |  |                                                              |               |         | 5,450  | 5,446  |
| NORMENT | Mar-21_1409 |                                          |  |                                                              |               |         | 2,703  | 2,702  |
| NORMENT | Mar-21_1413 |                                          |  |                                                              |               |         | 5,639  | 5,637  |
| NORMENT | Mar-21_1531 |                                          |  |                                                              |               |         | 1,974  | 1,971  |
| NORMENT | Mar-21_1532 |                                          |  | Unrelated                                                    |               |         | 219    | 219    |
