# Supplementary material
Source: publisher figshare collection journal article supplement (https://springernature.figshare.com/articles/dataset/_/20101841)
Supplement: Supplementary file 3 [file 2]

**Additional file 5: Table S4. Overview of variables included in ALSPAC and variables available in MoBa, for replication purposes.**

| MoBa                    |           |              |                     | ALSPAC                   |           |              |                   |
|-------------------------|-----------|--------------|---------------------|--------------------------|-----------|--------------|-------------------|
| Variable                | Role      | Measure      | Time                | Variable                 | Role      | Measure      | Time              |
| Age at menarche (years) | Predictor | Single item  | Age 14              | Age at menarche (months) | Predictor | Single item  | Age 8-17 (yearly) |
| Depressive symptoms     | Outcome   | SMFQ (13)    | Age 8, 14           | Depressive symptoms      | Outcome   | SMFQ (13)    | Age 14, 17, 19    |
| Psychiatric diagnoses   | Outcome   | Registries   | Age 10-17           | Depression diagnoses     | Outcome   | CIS-R        | Age 18            |
| Body mass index         | Covariate | Reported h/w | Age 8, 14           | Body mass index          | Covariate | Measured h/w | Age 9, 15         |
| Maternal age            | Covariate | Registry     | At delivery         | Maternal age             | Covariate | Single item  | At delivery       |
| Maternal education      | Covariate | Single item  | Week 17             | Maternal education       | Covariate | Single item  | Prenatal          |
| Prenatal depression     | Covariate | SCL-5+SCL-8  | Week 17 + 30        | Prenatal depression      | Covariate | Single items | Week 18, 32       |
| Postnatal depression    | Covariate | EPDS         | Age 6 months        | Postnatal depression     | Covariate | EPDS         | 2-61 months post  |
| Parental cohabitation   | Covariate | Single items | 18 months + 3 years | Father absence           | Covariate | Single items | Age < 5, 5-10     |
| Financial problems      | Covariate | Single items | 18 months           | Financial problems       | Covariate | Single item  | 2-61 months post  |
| Number of children      | Covariate | Single item  | Age 8               | Number of siblings       | Covariate | Single item  | Prenatal          |
| Parental income         | Covariate | Single items | Week 17             |                          |           |              |                   |
|                         |           |              |                     | Home ownership           | Covariate | Single item  | 2-122 months post |
|                         |           |              |                     | Occupation/social class  | Covariate | Single items | Prenatal          |

MoBa, the Norwegian Mother, Father, and Child Cohort Study; ALSPAC, the Avon Longitudinal Study of Parents and Children; SMFQ, Short Mood and Feelings Questionnaire; CIS-R, Clinical Interview Schedule-Revised; SCL, The (Hopkins) Symptom Checklist; EPDS, Edinburgh Postnatal Depression Scale.
