# Supplementary material
Source: publisher figshare collection journal article supplement (https://springernature.figshare.com/articles/dataset/_/20101841)
Supplement: Supplementary file 6 [file 2]

**Additional file 4: Table S3. Overview of variables to be included in the study, with details about items, reporters, and processing.**

| Variable              | Role      | Measure      | Items | Processing                                                                                                                                |
|-----------------------|-----------|--------------|-------|-------------------------------------------------------------------------------------------------------------------------------------------|
| Age of menarche       | Predictor | Single item  | 1     | menarche score calculated based on self-reported year of menarche at age 14y                                                              |
| Breast stage          | Predictor | Single item  | 1     | breast stage score calculated based on self-reported values on a scale from 0-4, from 'not yet started' to 'already complete' at age 14y  |
| Growth spurts         | Auxiliary | Single item  | 1     | growth spurts score calculated based on self-reported values on a scale from 0-4, from 'not yet started' to 'already complete' at age 14y |
| Body hair development | Auxiliary | Single item  | 1     | body hair score calculated based on self-reported values on a scale from 0-4, from 'not yet started' to 'already complete' at age 14y     |
| Skin changes          | Auxiliary | Single item  | 1     | skin change score calculated based on self-reported values on a scale from 0-4, from 'not yet started' to 'already complete' at age 14y   |
| Body mass index       | Covariate | Single items | 2     | child bmi scores calculated as weight (kg)/height <sup>2</sup> (m), based on mother report at age 8y and self-report at age 14y           |
| Parental income       | Covariate | Single items | 2     | income score calculated as mean of maternal and paternal gross income reported by mother at week 17 of pregnancy                          |
| Parental education    | Covariate | Single items | 2     | education score calculated as mean of maternal and paternal education reported by mother at week 17 of pregnancy                          |
| Paternal age          | Covariate | MBRN         | 1     | paternal age at the time of delivery based on registry data                                                                               |
| Maternal age          | Covariate | MBRN         | 1     | maternal age at the time of delivery based on registry data                                                                               |
| Child age             | Covariate | Single items | 2     | child age at questionnaire completion at age 8y, 14y                                                                                      |
| Financial problems    | Covariate | Single item  | 1     | financial problems based on mother report at child age 18 months                                                                          |
| Parental cohabitation | Covariate | Single items | 2     | parental cohabitation based on mother report at child age 18 months, 3y                                                                   |
| Number of children    | Covariate | Single item  | 1     | <i>n</i> children based on number reported by mother at child age 8y                                                                      |

|                      |           |                 |       |                                                                                                                                           |
|----------------------|-----------|-----------------|-------|-------------------------------------------------------------------------------------------------------------------------------------------|
| Prenatal depression  | Covariate | SCL-5+<br>SCL-8 | 5 & 8 | prenatal score as mean (available items)*total items (IF available_items > total_items/2) reported by mother week 17 & 30 of pregnancy    |
| Postnatal depression | Covariate | EPDS            | 6     | postnatal score calculated as mean (available items)*total items (IF available_items > total_items/2) reported by mother at 6 months      |
| Depressive symptoms  | Outcome   | SMFQ            | 13    | depression score calculated as mean (available items)*total items (IF available_items > total_items/2) at 8y (mother) & 14y (self-report) |
| Anxiety symptoms     | Outcome   | SCARED          | 5     | anxiety scores calculated as mean (available items)*total items (IF available_items > total_items/2) at 8y (mother) & 14y (self-report)   |
| ADHD symptoms        | Outcome   | RS-DBD          | 18    | adhd scores calculated as mean (available items)*total items (IF available_items > total_items/2) reported by mother at age 8y & 14y      |
| CD symptoms          | Outcome   | RS-DBD          | 8     | conduct scores calculated as mean (available items)*total items (IF available_items > total_items/2) at 8y (mother) & 14y (self-report)   |
| ODD symptoms         | Outcome   | RS-DBD          | 8     | opposition scores calculated as mean (available items)*total items (IF available_items > total_items/2) reported by mother at 8y & 14y    |
| Diagnoses            | Outcome   | KUHR/NPR        |       | ICPC-2: P23, P74, P76, P79, P81, P82 / ICD-10: F32-F33, F34.1, F40-F44, F90, F91-F92, F93.0-F93.2                                         |

BMI, body mass index; MBRN, The Medical Birth Registry; SCL, The (Hopkins) Symptom Checklist; EPDS, Edinburgh Postnatal Depression Scale; SMFQ, Short Mood and Feelings Questionnaire; SCARED, Screen for Child Anxiety and Related Disorders; ADHD, attention-deficit hyperactivity disorder; CD, conduct disorder; ODD, oppositional defiant disorder; RS-DBD, Parent/Teacher Rating Scale for Disruptive Behaviour Disorders; KUHR, Control and payment of health refunds; NPR, Norwegian Patient Registry; ICPC-2, The International Classification of Primary Care; ICD-10, International Statistical Classification of Diseases and Related Health Problems.
