# Supplementary material
Source: publisher figshare collection journal article supplement (https://springernature.figshare.com/articles/dataset/_/20101841)
Supplement: Supplementary file 8 [file 2]

12<sup>th</sup> January 2022

To whom it may concern,

The 14-year questionnaire data in the Norwegian Mother, Father and Child Cohort study (MoBa) have not been released and are therefore at the time of submission (12<sup>th</sup> Jan 2022) unavailable to the authors of the attached manuscript titled '*Assessing causal links between age at menarche and adolescent mental health: A Registered Report*'. This pertains to Adrian Dahl Askelund, Robyn E Wootton, Elizabeth Corfield, Helga Ask, Ted Reichborn-Kjennerud, Alexandra Havdahl, Laurie John Hannigan, and all other members of the PsychGen group and external collaborators who might be indirectly involved in the research.

Best regards,

*Ragna Bugge Askeland*

Ragna Bugge Askeland  
Project coordinator  
Department of Mental Disorders  
Norwegian Institute of Public Health  
Contact: [ragnabugge.askeland@fhi.no](mailto:ragnabugge.askeland@fhi.no)

*Alexandra Havdahl*

Alexandra Havdahl  
PI of PsychGen  
Department of Mental Disorders  
Norwegian Institute of Public Health  
Contact: [alexandra.havdahl@fhi.no](mailto:alexandra.havdahl@fhi.no)
