# Supplementary material
Source: publisher figshare collection journal article supplement (https://springernature.figshare.com/articles/dataset/_/20101841)
Supplement: Supplementary file 9 [file 2]

**Additional file 3: Table S2. Ordinal Cronbach's alphas for 8-year symptom scales.**

| Variable | Ordinal alpha |
|----------|---------------|
| adhd     | 0.94          |
| cd       | 0.93          |
| odd      | 0.91          |
| dep      | 0.92          |
| anx      | 0.76          |

adhd, attention-deficit hyperactivity disorder; cd, conduct disorder; odd, oppositional defiant disorder; dep, depression; anx, anxiety.
